# Supplementary material for: Mediterranean Diet and White Matter Hyperintensity Change over Time in Cognitively Intact Adults
Source: MDPI journal article supplement (doi:10.3390/nu14173664), 2022-09-05
Supplement: s1 [file s1]

**Table S1.** Comparison of participants characteristics between those included and excluded in the final models baseline.

|                                           | Participants Included in<br>the Analysis (n = 183) | Participants Not<br>Included in the<br>Analysis (n = 379) | <i>p</i> -Diff |
|-------------------------------------------|----------------------------------------------------|-----------------------------------------------------------|----------------|
| Age, mean (SD), years                     | 53.19 (16.52)                                      | 54.01 (17.28)                                             | 0.590          |
| Sex                                       |                                                    |                                                           |                |
| Male, n (%)                               | 89 (48.63)                                         | 154 (40.63)                                               | 0.073          |
| Female, n (%)                             | 94 (51.37)                                         | 225 (59.37)                                               |                |
| Education <sup>a</sup> , mean (SD), years | 16.33 (2.37)                                       | 16.08 (2.37)                                              | 0.243          |
| NARTIQ <sup>b</sup> , mean (SD)           | 117.82 (8.20)                                      | 116.38 (9.06)                                             | 0.071          |
| Race/ethnicity <sup>c</sup>               |                                                    |                                                           |                |
| Non-Hispanic White and<br>Others, n (%)   | 120 (65.57)                                        | 234 (62.07)                                               | 0.707          |
| Non-Hispanic Black, n (%)                 | 40 (21.86)                                         | 93 (24.67)                                                |                |
| Hispanic, n (%)                           | 23 (12.57)                                         | 50 (13.26)                                                |                |

<sup>a</sup>Three missing values are included in the “participants not included in the analysis” group. <sup>b</sup>Twenty-seven missing values are included in the “participants not included in the analysis” group. <sup>c</sup>Two missing values are included in the “participants not included in the analysis” group.

**Table S2.** The Mediterranean diet score and the frequency of consumption for each food category.

| Frequency of<br>Consumption<br>(Servings/Month) | Score   |       |       |       |       |     |
|-------------------------------------------------|---------|-------|-------|-------|-------|-----|
|                                                 | 0       | 1     | 2     | 3     | 4     | 5   |
| Cereal                                          | 0       | 1–4   | 5–8   | 9–12  | 13–18 | >18 |
| Potato                                          | 0       | 1–6   | 7–12  | 13–18 | 19–22 | >22 |
| Fruit                                           | 0       | 1–6   | 7–12  | 13–18 | 19–22 | >22 |
| Vegetable                                       | 0       | 1–6   | 7–12  | 13–18 | 19–22 | >22 |
| Legumes and nuts                                | 0       | 1–6   | 7–12  | 13–18 | 19–22 | >22 |
| Fish                                            | 0       | 1–6   | 7–12  | 13–18 | 19–22 | >22 |
| Oil                                             | 0       | 1–6   | 7–12  | 13–18 | 19–22 | >22 |
| Poultry                                         | >22     | 19–22 | 13–18 | 7–12  | 1–6   | 0   |
| Red meat                                        | >22     | 19–22 | 13–18 | 7–12  | 1–6   | 0   |
| Dairy                                           | >22     | 19–22 | 13–18 | 7–12  | 1–6   | 0   |
| Alcohol                                         | 0 & >60 | 31–60 | 15–30 | 5–14  | 3–4   | 1–2 |
